# Supplementary material
Source: PubMed Central journal article supplement (PMC4539372)
Supplement: MCB.00429-15_zmb999100951so1.pdf [file MCB.00429-15_zmb999100951so1.pdf]

## Supplemental Material

**Table S1.** Primers used for reverse transcription and quantitative real-time PCR.

| Name           | Primers                                             |
|----------------|-----------------------------------------------------|
| PU.1-F         | ACCTGGTGCCCTATGACA                                  |
| PU.1-R         | GTGAAGTTGTTCTCGGCG                                  |
| GAPDH-F        | GGAGCGAGATCCCTCCAAAAT                               |
| GAPDH-R        | GGCTGTTGTCATACTTCTCATGG                             |
| Actin-F        | CTGGCACACACCTTCTACA                                 |
| Actin-R        | AGCACAGCCTGGATAGCAAC                                |
| CD11b-F        | GGGCTGGTGGAGTCTTTCTAT                               |
| CD11b-R        | TTCTGCCCTGAACATCGCTA                                |
| CD14-F         | CGCTCCGAGATGCATGTG                                  |
| CD14-R         | TTGGCTGGCAGTCCTTTAGG                                |
| CSF1R-F        | CCTGAAGGTGGCTGTGAAGATG                              |
| CSF1R-R        | GCTCCCAGAAGGTTGACGATG                               |
| lnc-MC-RT      | CACATCCAGGACAGAATGACAATC                            |
| lnc-MC-F       | TCAGGTTATCCGTCCACTTT                                |
| lnc-MC-R       | GGGTTATTGTTGTATCGCC                                 |
| miR-199a-5p-RT | GTCGTATCCAGTGCAGGGTCCGAGGTATTCGCACTGGATACGACGAACAGG |
| miR-199a-5p-Up | CTCGTCCCCAGTGTCAGACTAC                              |
| miR-938-RT     | GTCGTATCCAGTGCAGGGTCCGAGGTATTCGCACTGGATACGACACTGGGT |
| miR-938-Up     | GTCGAGTGCCCTTAAAGGTGAA                              |
| miRNA-Dn       | TCCAGTGCAGGGTCCGAGGT                                |
| U6-RT          | AAAATATGGAACGCTTCACGAA                              |
| U6-Up          | CTCGCTTCGGCAGCACATATA                               |
| U6-Dn          | ACGCTTCACGAATTTGCGTGTC                              |
| oligodT        | TTTTTTTTTTTTTTTTTTTT                                |

**Table S2** Primers and oligonucleotides used for plasmid construction.

| Name                 | Primers and oligonucleotides                                    |
|----------------------|-----------------------------------------------------------------|
| lnc-MC-CEF1          | <u>GGATCCT</u> CCAGGTGCAGGGGCTT( BamH I )                       |
| lnc-MC-CER1          | <u>GCGGCCG</u> CCCATCCAGGACAGAATG ( Not I )                     |
| lnc-MC-CEF2          | <u>ACTAGTT</u> CCAGGTGCAGGGGCTT( Spe I)                         |
| lnc-MC-CER2          | <u>AAGCTTC</u> ATCCAGGACAGAATGAC( Hind III)                     |
| lnc-MC-MF1-199a      | GCATCATGTAGCTGCTCAAAGAGTT                                       |
| lnc-MC-MR1-199a      | TGAGCAGCTACATGATGCCACAAGT                                       |
| lnc-MC-DF1-199a      | TGGAATTTCCCTCAAAGAGTTTCAG                                       |
| lnc-MC-DR1-199a      | TCTTTGAGGGAAATTCACATGTG                                         |
| PU.1-CEF1            | <u>GAATTC</u> AGCCCGGCTGGATGTT( EcoR I )                        |
| PU.1-CER1            | <u>CTCGAGG</u> GAGCGTCCTCCCTGTG( Xho I )                        |
| pri-miR-199a-CEF1    | <u>GAATTC</u> TCGGGAAGAGTGGTGGTTT( EcoR I )                     |
| pri-miR-199a-CER1    | <u>GCGGCCG</u> CGGGATGGCAGACTGATAGGG( Not I )                   |
| shcon-F              | TGAACTCAAGACCGATATTATTCAAGAGATAATATCGGTCTTGAGTTCTTTTTTC         |
| shcon-R              | TCGAGAAAAAAGAAGCTCAAGACCGATATTATCTCTTGAATAATATCGGTCTTGAGTTCA    |
| PU.1-shRNA-F         | TGTCCGTATGTAAATCAGATCTTTCAAGAGAAGATCTGATTTACATACGGACTTTTTTC     |
| PU.1-shRNA-R         | TCGAGAAAAAAGTCCGTATGTAAATCAGATCTTCTCTTGAAAGATCTGATTTACATACGGACA |
| lnc-MC-shRNA-F1      | TGTATCACATTGGAATTACATTCAAGAGATGTAATTCCAATGTGATACTTTTTTC         |
| lnc-MC-shRNA-R1      | TCGAGAAAAAAGTATCACATTGGAATTACATCTTGAATGTAATTCCAATGTGATACA       |
| lnc-MC-shRNA-F2      | TGGATATAGCTTGTACAGTTTCAAGAGAAGCTGTGACAAGCTATATCCTTTTTTC         |
| lnc-MC-shRNA-R2      | TCGAGAAAAAAGGATATAGCTTGTACAGTTCTCTTGAAACTGTGACAAGCTATATCCA      |
| miR-199a-5p-sensor-F | CTAGGAACAGGTAGTCTGAACACTGGGGAACAGGTAGTCTGAACACTGGGCCGG          |
| miR-199a-5p-sensor-R | CCCAGTGTTCAGACTACCTGTTCCCCAGTGTTCAGACTACCTGTTC                  |

**Table S3** Primers used for ChIP-PCR.

| Name    | Primers                  |
|---------|--------------------------|
| ChIP-F1 | CGGTAAGGAGGCAATCTGAA     |
| ChIP-R1 | GATGGGAGGAGAACAAGGAAA    |
| ChIP-F2 | TCTTCCATCCTCCTCCTCAC     |
| ChIP-R2 | TTTCCTTCACTCTCATCACAGTCT |
| ChIP-F3 | ATTCTTGGATGTGCTGGGAGT    |
| ChIP-R3 | AGCAGCGCATAGCTTCTGTCA    |
| ChIP-F4 | TTGGCAAGAGATGAAGAGGG     |
| ChIP-R4 | TTCAGATTGCCTCCTTACCG     |
| ChIP-F5 | TAGCAGCCTGGTATAGGAGGTC   |
| ChIP-R5 | GAGGAGGATGGAGAGGGAA      |
